# Supplementary material
Source: Research Square preprint supplement (doi:10.21203/rs.3.rs-10383861/v1)
Supplement: Supplementary file 1 [file 9f2fd518955399a2af1cdda3.docx]

## Appendix A: Non-Gaussian Kernel Extensions

The Gaussian kernel K(x,ξ;σ) = N⁻¹ exp[−D²(x,ξ)/2σ²] employed throughout the main text represents the minimal parameterisation consistent with the isotropy and normalisation constraints of the projection model. However, the physical geometry of S⁵D may impose non-Gaussian correlation structures that a single-scale Gaussian kernel cannot capture. Two alternative kernel families are introduced here for completeness and for use in the full numerical implementation [28, 29].

**Matérn Kernel**

The Matérn class of kernels is parameterised as:

M_ν(x,ξ) = N⁻¹ · (2^(1−ν)/Γ(ν)) · (√(2ν) D(x,ξ)/ℓ)^ν · K_ν(√(2ν) D(x,ξ)/ℓ)　　(A1)

where ν controls the smoothness of the projection (ν = 1/2 gives an exponential kernel, ν → ∞ recovers the Gaussian), ℓ is the characteristic coherence length, and M_ν denotes the modified Bessel function of the second kind [30]. The Matérn kernel is preferred when the S⁵D structural field is expected to have finite differentiability rather than infinite smoothness, as in the Gaussian case. For ν = 3/2, the kernel reduces to:

K_{3/2}(x,ξ) = N⁻¹ · (1 + √3 D/ℓ) · exp(−√3 D/ℓ)　　　　(A2)

which is computationally tractable and introduces a characteristic correlation length ℓ distinct from the projection coherence scale σ.

**Lorentzian Kernel**

For projection geometries in which S⁵D structural correlations exhibit heavy-tailed behaviour—consistent with scale-free relational networks—the Lorentzian kernel provides an alternative [29]:

K_L(x,ξ) = N⁻¹ · (1 + D²(x,ξ)/γ²)⁻¹　　　　　　(A3)

where γ is the half-width parameter governing the rate of correlation decay. Unlike the Gaussian, the Lorentzian kernel decays as a power law rather than exponentially, predicting stronger residual correlations at large structural separations. This is directly relevant to the super-horizon correlation floor ξ₀: under the Lorentzian kernel, ξ₀ is expected to be larger in amplitude and more extended in scale than under the Gaussian approximation, providing a sharper observational discriminant between kernel families.

The three kernel families make qualitatively different predictions for the residual amplitude and scale dependence of ξ_Π(r). A measurement of the super-horizon correlation floor that constrains both amplitude and scale dependence simultaneously can therefore discriminate between kernel families, providing an additional layer of empirical content beyond the binary test of whether ξ₀ ≠ 0.
